# Supplementary material for: Mining Endonuclease Cleavage Determinants in Genomic Sequence Data
Source: PubMed Central journal article supplement — J Biol Chem. 2011 Jul 21;286(37):32617–27. doi: 10.1074/jbc.M111.259572 (PMC3173205; doi:10.1074/jbc.m111.259572), 2011-07-21
Supplement: supp_M111.259572_jbc.M111.259572-1.pdf [file supp_M111.259572_jbc.M111.259572-1.pdf]

## Supplementary Information

### Contents:

- Supplementary Figure S1. Alignment of proteins homologous to I-AniI.
- Supplementary Table S1. Percent identity and similarity to I-AniI for each homologue previously identified in Figure S1.
- Supplementary Figure S2. Example putative target site identification for I-PnoIP, an I-AniI homologue.
- Supplementary Figure S3. Specificity profile of I-NfiIP and I-AniI-S111Y at 25nM and 250nM enzyme concentration.
- Supplementary Table S2.  $EC_{0.5max}$  (nM) cleavage efficiencies and cleavage plateaus ( $f_{max}$ , the maximal fraction of site cleavage) for homologue-based I-AniI variants tested on singly-substituted target sites.
- Supplementary Figure S4. Cleavage profiles for the C-terminal loop transfers and I-AniI-F13Y at positions +7 through +10.
- Supplementary Figure S5. Cleavage profiles for the K200 variants and I-AniI-F13Y at +3, +4, and +5.
- Supplementary Figure S6. Cleavage profiles of variants affecting the central four target site positions.
- Supplementary Figure S7. Cleavage profiles for I-AniI-S111Y at positions -6 and -5.
- Supplementary Figure S8. Cleavage profile for I-PnoIP N-terminal transfer at -5 position.
- Supplementary Table S3. Sequences of target sites near disease-causing genes that contain the novel +3C, +7A, and -6T specificities.

### Supplementary Figure S1. Alignment of proteins homologous to I-Anil.

Multiple sequence alignment of proteins homologous to I-Anil found using NCBI BLAST's blastp and tblastn (1) that have putative (denoted by suffix P (2)) endonuclease activity as of March 2011. The repository of data from new protein sequences and their characterizations is continuously growing (e.g. the recently elucidated maturase activity of the I-Anil homologue 2AB5 (3)). The most distant homologue in this alignment, I-MfaIP, has 47% sequence identity and 70% similarity. Alignments with less than 40% identity were predicted to have significantly divergent putative target site sequences (data not shown) and were not chosen for examination.

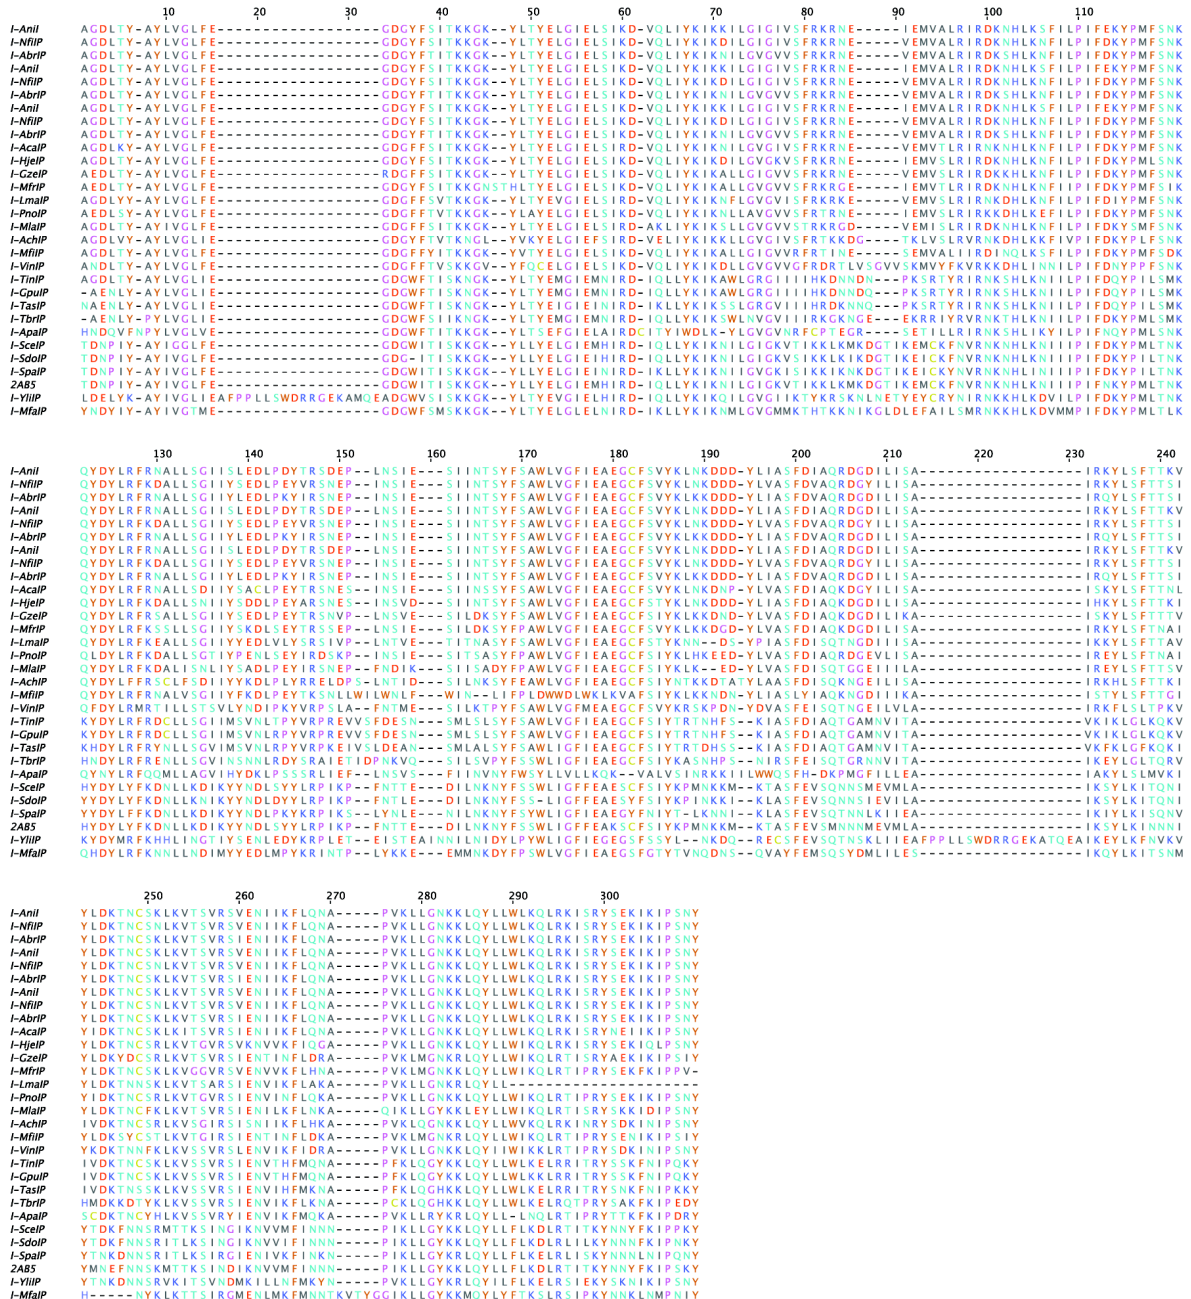

**Supplementary Table S1. Percent identity and similarity to I-AniI for each homologue previously identified and aligned in Figure S1.**

| <b>Homologue Name</b> | <b>Accession Number</b> | <b>Percent Identity to I-AniI</b> | <b>Percent Similarity to I-AniI</b> |
|-----------------------|-------------------------|-----------------------------------|-------------------------------------|
| I-AniI                | pdb 2QOJ Z              | 100%                              | 100%                                |
| I-NfiIP               | gb AAX39426.1           | 93%                               | 98%                                 |
| I-AbrIP               | dbj AB026120.1          | 92%                               | 97%                                 |
| I-AcaIP               | gb EER36338.1           | 88%                               | 95%                                 |
| I-HjeIP               | gb AF447590.1           | 86%                               | 95%                                 |
| I-GzeIP               | gb ABC86634.1           | 84%                               | 93%                                 |
| I-MfrIP               | gb GU952815.1           | 81%                               | 90%                                 |
| I-LmaIP               | emb CBX89979.1          | 79%                               | 89%                                 |
| I-PnoIP               | gb ABU49435.1           | 78%                               | 91%                                 |
| I-MlaIP               | gb GU933642.1           | 72%                               | 86%                                 |
| I-AchIP               | gb AAX34413.1           | 71%                               | 86%                                 |
| I-MfiIP               | gb AF343070.1           | 69%                               | 79%                                 |
| I-VinIP               | gb AAB95258.1           | 64%                               | 79%                                 |
| I-TinIP               | dbj AB175764.1          | 59%                               | 75%                                 |
| I-GpuIP               | dbj AB175779.1          | 59%                               | 75%                                 |
| I-TasIP               | dbj AB175746.1          | 57%                               | 74%                                 |
| I-TbrIP               | dbj AB175750.1          | 57%                               | 76%                                 |
| I-ApaIP               | gb AF538047.1           | 52%                               | 67%                                 |
| I-ScelIP              | emb CAA32785.1          | 51%                               | 70%                                 |
| I-SdoIP               | emb X59280.1            | 50%                               | 72%                                 |
| I-SpaIP               | gb EU852811.1           | 50%                               | 72%                                 |
| 2AB5 (maturase)       | pdb 2AB5 A              | 49%                               | 67%                                 |
| I-YliIP               | emb AJ307410.1          | 49%                               | 66%                                 |
| I-MfaIP               | emb CAY39274.1          | 47%                               | 70%                                 |

**Supplementary Figure S2. Example putative target site identification for I-PnoIP, an I-AniI homologue.** An intron (approximately spanning positions 8073 through 9092) within the cytochrome B gene of the complete annotated *Phaeosphaeria nodorum* SN15 mitochondrion genome (gb|EU053989.1) is observed to encode a LAGLIDADG endonuclease from position 8108 through 9037 (bold text), the homologue ORF. The flanking nucleotide sequences were examined and aligned as shown to each half of the native I-AniI target site. The resulting predicted sequence of the target site for I-PnoIP is colored yellow.

```

Pno genome 8041 aggacaagatattggtgaatttatttgaggtggtttaaacacagttggac 8090
                | | | | | . | | | | |
                -----TGAGGAGGTTT----- ← (-) half of I-AniI site

8091 cacattacggtgacgtaatgttaaaaattttgcttaatgctggaaaatcc 8140
8141 ccaattttagtatttgcatacgatttattcttgattttaacaacaattat 8190
8191 ttacgtaaaaattgcattgacatgggacaattcagcaggggtgagaagta 8240
8241 tacacacttcagaagcctctcagagactacatgcagaagatctctcatat 8290
8291 gcttatttagtaggtttatttgaaggtgacggttttttactgttacaa 8340
8341 aaaaggtaaatatctagcctatgaattaggtattgaatgtctattaag 8390
8391 acgttcaattgatatataaaaattaaaaatcttttagctgtaggtgtagta 8440
8441 agtttttagaacaagaaatgaaatgaaatggtatctttagaattagaa 8490
8491 aaaagaccatttaaagaatttatctacccaatttgataaataoccta 8540
8541 tgttttctaataaacaactgattacttaagatttaaagacgcactatta 8590
8591 tctggtactatatatccagagaatttatctgaatatattagagatgtagaa 8640
8641 acctataaaattcgatagaatctattacaagtgcttctatttttccgctt 8690
8691 gattagtaggatttatagaagctgaaggtgtttcagtatttacaaaatta 8740
8741 cacaaagaggaagattttttagtggctagtttcgatattgctcaaagaga 8790
8791 tggagaggtattaatatctgctattcgtgagtatttatcttttactaatg 8840
8841 ctatatacatagataaaaactaattgttccagactgaaagttacaggtgta 8890
8891 agatctatagaaaatgttattattttttacaaaaggctcctgtaaaatt 8940
8941 attgggtataaaaaattacaatttatttattgaattaaacaattacgta 8990
8991 ctataacctagatattcagagaaaattagataccttaaaattactaaaga 9040
9041 gagatcaagatatagtccgatcaataaagaaatttattgagcgtaacgat 9090
9091 agttgttcaaatgaagttaccaacacaaatgctctgttaacaatgcta 9140
                | | | | | . | |
                -----CTCTGTAAA----- ← (+) half of I-AniI site

```

**Supplementary Table S2.  $EC_{0.5max}$  (nM) cleavage efficiencies and cleavage plateaus ( $f_{max}$ , the maximal fraction of site cleavage) for homologue-based I-AniI variants tested on singly-substituted target sites.** Variants are grouped into categories (C-terminal loops, K200, Central 4 loops, Core Mutations) dependent on the location and theorized role of the mutations transferred to the I-AniI scaffold. All variants include the F80K and L233K mutations for solubility, with the exception of the K24N/T29K variant that only includes F80K. The base activity column indicates whether the variant was made with the activating F13Y or S111Y mutations.  $EC_{0.5max}$  values are the mean (nM)  $\pm$  coefficient of variation (%CV) of two independently determined enzyme cleavage profiles chosen (via inspection for substrate degradation and experimental error) from at least two separate *in vitro* cleavage assays on plasmid DNA substrates containing single base-pair substitutions from the I-AniI wild-type target site. The CV is given as a percentage measure of variability estimated through dividing the standard error from the mean (SEM) by the mean. Values of  $EC_{0.5max} > 750$ nM are too high to allow accurate quantitative determination, and therefore no cleavage plateau is reported.  $f_{max} \approx 1$  designates a cleavage plateau at its greatest allowable value, meaning the substrate can be completely cleaved with no remaining uncut fraction.

| Variant                 | Mutations                                                             | Base Activity | Position  | $EC_{0.5max}$ (nM) | Cleavage Plateau |       |
|-------------------------|-----------------------------------------------------------------------|---------------|-----------|--------------------|------------------|-------|
| <b>C-terminal loops</b> |                                                                       |               |           |                    |                  |       |
| I-PnoIP                 | V153I, N157H, D159E, D160E, I164V                                     | F13Y          | wild-type | 4 $\pm$ 3%         | 0.980            |       |
|                         |                                                                       |               | +8A       | C                  | 3 $\pm$ 28%      | 0.987 |
|                         |                                                                       |               |           | G                  | 19 $\pm$ 40%     | 0.938 |
|                         |                                                                       |               |           | T                  | 3 $\pm$ 41%      | 0.975 |
|                         |                                                                       |               | +9A       | C                  | 70 $\pm$ 23%     | ~1    |
|                         |                                                                       |               |           | G                  | 41 $\pm$ 23%     | ~1    |
|                         |                                                                       |               |           | T                  | 15 $\pm$ 31%     | 0.987 |
|                         |                                                                       |               | +10G      | A                  | 6 $\pm$ 9%       | 0.981 |
|                         |                                                                       |               |           | C                  | 8 $\pm$ 27%      | 0.960 |
|                         |                                                                       |               |           | T                  | 5 $\pm$ 42%      | 0.974 |
| I-AchIP                 | V153I, K155N, L156T, N157K, D160T, inserted A after 160, D161T, I164A | F13Y          | wild-type | 8 $\pm$ 6%         | 0.977            |       |
|                         |                                                                       |               | +7T       | A                  | 8 $\pm$ 31%      | 0.995 |
|                         |                                                                       |               |           | C                  | 74 $\pm$ 5%      | 0.965 |
|                         |                                                                       |               |           | G                  | 328 $\pm$ 7%     | ~1    |
|                         |                                                                       |               | +8A       | C                  | 8 $\pm$ 4%       | 0.985 |
|                         |                                                                       |               |           | G                  | 13 $\pm$ 6%      | 0.948 |
|                         |                                                                       |               |           | T                  | 6 $\pm$ 27%      | 0.980 |
|                         |                                                                       |               | +9A       | C                  | 10 $\pm$ 8%      | 0.981 |
|                         |                                                                       |               |           | G                  | 11 $\pm$ 8%      | 0.986 |
|                         |                                                                       |               |           | T                  | 9 $\pm$ 3%       | 0.981 |
|                         |                                                                       |               | +10G      | A                  | 8 $\pm$ 20%      | 0.966 |
|                         |                                                                       |               |           | C                  | 8 $\pm$ 13%      | 0.957 |
|                         |                                                                       |               |           | T                  | 8 $\pm$ 23%      | 0.974 |
| I-TasIP                 | K155T, L156R, N157T, K158 deletion, D160H, D161S, Y162S, L163K        | F13Y          | wild-type | 86 $\pm$ 35%       | 0.941            |       |
|                         |                                                                       |               | +7T       | A                  | 20 $\pm$ 32%     | 0.934 |
|                         |                                                                       |               |           | C                  | 588 $\pm$ 26%    | ~1    |
|                         |                                                                       |               |           | G                  | 459 $\pm$ 41%    | 0.752 |
|                         |                                                                       |               | +8A       | C                  | 48 $\pm$ 18%     | 0.856 |
|                         |                                                                       |               |           | G                  | 6 $\pm$ 13%      | 0.942 |

|                        |                                                                                   |       |           |          |           |       |
|------------------------|-----------------------------------------------------------------------------------|-------|-----------|----------|-----------|-------|
|                        |                                                                                   |       | T         | 35 ± 13% | 0.910     |       |
|                        |                                                                                   |       | +9A       | C        | 6 ± 1%    | 0.857 |
|                        |                                                                                   |       |           | G        | 81 ± 13%  | 0.864 |
|                        |                                                                                   |       |           | T        | 79 ± 11%  | 0.925 |
|                        |                                                                                   |       | +10G      | A        | 139 ± 25% | ~1    |
|                        |                                                                                   |       |           | C        | 15 ± 22%  | 0.928 |
|                        |                                                                                   |       |           | T        | 80 ± 5%   | ~1    |
| <b>K200</b>            |                                                                                   |       |           |          |           |       |
| I-NfilIP               | I164V, K200N                                                                      | F13Y  | wild-type |          | 6 ± 5%    | 0.981 |
|                        |                                                                                   |       | +3T       | A        | 146 ± 4%  | 0.854 |
|                        |                                                                                   |       |           | C        | 14 ± 39%  | 0.925 |
|                        |                                                                                   |       |           | G        | 155 ± 8%  | 0.670 |
|                        |                                                                                   |       | +4C       | A        | 260 ± 7%  | 0.565 |
|                        |                                                                                   |       |           | G        | 205 ± 14% | ~1    |
| T                      | 155 ± 32%                                                                         | 0.612 |           |          |           |       |
| I-PnoIP                | K200R                                                                             | F13Y  | wild-type |          | 7 ± 15%   | 0.977 |
|                        |                                                                                   |       | +3T       | A        | 140 ± 7%  | ~1    |
|                        |                                                                                   |       |           | C        | 358 ± 27% | 0.929 |
|                        |                                                                                   |       |           | G        | 42 ± 9%   | 0.996 |
|                        |                                                                                   |       | +4C       | A        | 118 ± 4%  | ~1    |
|                        |                                                                                   |       |           | G        | 116 ± 8%  | ~1    |
|                        |                                                                                   |       |           | T        | 18 ± 17%  | 0.962 |
|                        |                                                                                   |       | +5T       | A        | 5 ± 28%   | 0.951 |
|                        |                                                                                   |       |           | C        | 17 ± 31%  | 0.950 |
|                        |                                                                                   |       |           | G        | 9 ± 24%   | 0.933 |
| <b>Central 4 loops</b> |                                                                                   |       |           |          |           |       |
| I-GzeIP*               | R172K, T196Y, N197D                                                               | S111Y | wild-type |          | 7 ± 28%   | 0.919 |
|                        |                                                                                   |       | +2C       | A        | 100 ± 7%  | ~1    |
|                        |                                                                                   |       |           | G        | 348 ± 7%  | 0.717 |
|                        |                                                                                   |       |           | T        | 27 ± 25%  | 0.954 |
|                        |                                                                                   |       | +3T       | A        | 212 ± 6%  | ~1    |
|                        |                                                                                   |       |           | C        | 315 ± 6%  | 0.860 |
| G                      | 156 ± 6%                                                                          | ~1    |           |          |           |       |
| I-AchIP                | K60T, R61K, N62K, E63D, inserted G after 63, I64T, E65K, M66L                     | S111Y | wild-type |          | 18 ± 4%   | 0.956 |
|                        |                                                                                   |       | -2T       | A        | 6 ± 2%    | 0.953 |
|                        |                                                                                   |       |           | C        | 40 ± 6%   | 0.987 |
| G                      | 10 ± 16%                                                                          | 0.979 |           |          |           |       |
| I-VinIP Loop           | S57G, K60D, N62T, E63L, I64V, SGVVS insert after 64, E65K, A68Y, L69F, R70K, I71V | S111Y | wild-type |          | 32 ± 9%   | 0.962 |
|                        |                                                                                   |       | -2T       | A        | 26 ± 5%   | 0.927 |
|                        |                                                                                   |       |           | C        | 21 ± 24%  | 0.929 |
|                        |                                                                                   |       |           | G        | 23 ± 28%  | 0.932 |
| <b>Core mutations</b>  |                                                                                   |       |           |          |           |       |
| I-VinIP w/o core       | A68Y, R70K                                                                        |       | wild-type |          | >750      | N/A   |
|                        |                                                                                   |       | -6G       | A        | >750      | N/A   |
|                        |                                                                                   |       |           | C        | >750      | N/A   |
|                        |                                                                                   |       |           | T        | >750      | N/A   |
|                        |                                                                                   |       | -5A       | C        | >750      | N/A   |
|                        |                                                                                   |       |           | G        | >750      | N/A   |
| T                      | >750                                                                              | N/A   |           |          |           |       |
| I-VinIP w/ core        | A68Y, L69F, R70K, I71V                                                            |       | wild-type |          | 428 ± 2%  | ~1    |
|                        |                                                                                   |       | -6G       | A        | >750      | N/A   |

|                                        |                                                                                   |       |           |   |           |       |
|----------------------------------------|-----------------------------------------------------------------------------------|-------|-----------|---|-----------|-------|
|                                        |                                                                                   |       |           | C | >750      | N/A   |
|                                        |                                                                                   |       |           | T | >750      | N/A   |
|                                        |                                                                                   |       | -5A       | C | >750      | N/A   |
|                                        |                                                                                   |       |           | G | 721 ± 5%  | ~1    |
|                                        |                                                                                   |       |           | T | >750      | N/A   |
| I-VinIP-S111Y w/o core                 | A68Y, R70K                                                                        | S111Y | wild-type |   | 68 ± 16%  | ~1    |
|                                        |                                                                                   |       | -6G       | A | 182 ± 45% | 0.229 |
|                                        |                                                                                   |       |           | C | >750      | N/A   |
|                                        |                                                                                   |       |           | T | 245 ± 15% | ~1    |
|                                        |                                                                                   |       | -5A       | C | 523 ± 3%  | ~1    |
|                                        |                                                                                   |       |           | G | 111 ± 23% | ~1    |
|                                        |                                                                                   |       |           | T | 424 ± 4%  | 0.955 |
| I-VinIP-S111Y w/ core                  | A68Y, L69F, R70K, I71V                                                            | S111Y | wild-type |   | 31 ± 34%  | ~1    |
|                                        |                                                                                   |       | -6G       | A | 176 ± 24% | 0.310 |
|                                        |                                                                                   |       |           | C | >750      | N/A   |
|                                        |                                                                                   |       |           | T | 135 ± 13% | 0.983 |
|                                        |                                                                                   |       | -5A       | C | 362 ± 0%  | ~1    |
|                                        |                                                                                   |       |           | G | 89 ± 10%  | 0.996 |
|                                        |                                                                                   |       |           | T | 404 ± 1%  | ~1    |
| I-VinIP Loop                           | S57G, K60D, N62T, E63L, I64V, SGVVS insert after 64, E65K, A68Y, L69F, R70K, I71V | S111Y | wild-type |   | 32 ± 9%   | 0.962 |
|                                        |                                                                                   |       | -6G       | A | 208 ± 22% | 0.995 |
|                                        |                                                                                   |       |           | C | 112 ± 19% | 0.996 |
|                                        |                                                                                   |       |           | T | 28 ± 13%  | 0.994 |
|                                        |                                                                                   |       | -5A       | C | 67 ± 1%   | 0.989 |
|                                        |                                                                                   |       |           | G | 31 ± 8%   | 0.957 |
|                                        |                                                                                   |       |           | T | 38 ± 15%  | 0.969 |
| K24N/L28V/T29K                         | K24N, L28V, T29K                                                                  |       | wild-type |   | >750      | N/A   |
|                                        |                                                                                   |       | -8A       | C | >750      | N/A   |
|                                        |                                                                                   |       |           | G | 23 ± 15%  | 0.939 |
|                                        |                                                                                   |       |           | T | 750 ± 9%  | ~1    |
| K24N/T29K                              | K24N, T29K, lacking L233K                                                         |       | wild-type |   | >750      | N/A   |
|                                        |                                                                                   |       | -8A       | C | >750      | N/A   |
|                                        |                                                                                   |       |           | G | 23 ± 8%   | 0.873 |
|                                        |                                                                                   |       |           | T | >750      | N/A   |
| <b>I-Anil Base Activity Comparison</b> |                                                                                   |       |           |   |           |       |
| I-Anil-F13Y                            | F13Y                                                                              | F13Y  | wild-type |   | 10 ± 31%  | 0.996 |
|                                        |                                                                                   |       | +2C       | A | 194 ± 35% | 0.982 |
|                                        |                                                                                   |       |           | G | 608 ± 11% | 0.310 |
|                                        |                                                                                   |       |           | T | 17 ± 23%  | 0.900 |
|                                        |                                                                                   |       | +3T       | A | 343 ± 26% | 0.950 |
|                                        |                                                                                   |       |           | C | 503 ± 20% | 0.869 |
|                                        |                                                                                   |       |           | G | 214 ± 7%  | ~1    |
|                                        |                                                                                   |       | +4C       | A | 393 ± 13% | 0.921 |
|                                        |                                                                                   |       |           | G | 437 ± 25% | 0.898 |
|                                        |                                                                                   |       |           | T | 236 ± 19% | 0.943 |
|                                        |                                                                                   |       | +5T       | A | 11 ± 24%  | 0.934 |
|                                        |                                                                                   |       |           | C | 60 ± 35%  | 0.967 |
|                                        |                                                                                   |       |           | G | 27 ± 40%  | 0.987 |
|                                        |                                                                                   |       | +7T       | A | 119 ± 28% | 0.949 |
|                                        |                                                                                   |       |           | C | 140 ± 21% | ~1    |
|                                        |                                                                                   |       |           | G | 189 ± 26% | ~1    |

|              |       |       |           |   |           |       |
|--------------|-------|-------|-----------|---|-----------|-------|
|              |       |       | +8A       | C | 9 ± 28%   | 0.964 |
|              |       |       |           | G | 36 ± 11%  | 0.983 |
|              |       |       |           | T | 9 ± 26%   | 0.956 |
|              |       |       | +9A       | C | 101 ± 1%  | ~1    |
|              |       |       |           | G | 25 ± 10%  | 0.971 |
|              |       |       |           | T | 23 ± 44%  | 0.981 |
|              |       |       | +10G      | A | 5 ± 9%    | 0.959 |
|              |       |       |           | C | 12 ± 35%  | 0.950 |
|              |       |       |           | T | 9 ± 36%   | 0.944 |
| I-Anil-S111Y | S111Y | S111Y | wild type |   | 9 ± 21%   | 0.969 |
|              |       |       | -6G       | A | >750      | N/A   |
|              |       |       |           | C | 379 ± 21% | ~1    |
|              |       |       |           | T | 173 ± 5%  | ~1    |
|              |       |       | -5A       | C | 55 ± 2%   | ~1    |
|              |       |       |           | G | 21 ± 21%  | 0.989 |
|              |       |       |           | T | 27 ± 25%  | 0.985 |
|              |       |       | -2T       | A | 7 ± 20%   | 0.959 |
|              |       |       |           | C | 12 ± 1%   | 0.967 |
|              |       |       |           | G | 11 ± 3%   | 0.975 |

\* This variant contains an additional I248V mutation that does not affect cleavage efficiency, as it is at the end of the C-terminal domain far from the interface.



**Supplementary Figure S3. Specificity profile of I-NfiIP and I-AniI-S111Y at 25nM and 250nM enzyme concentration.** Cleavage fractions of wild-type (denoted by asterisk) and singly-substituted target sites for all 20 positions are shown. Assays were performed in triplicate, with error bars representing the SEM. A fraction of 1 indicates complete cleavage of the substrate with no remaining uncut fraction. Since the sequence of homologue I-NfiIP contains the activating mutation S111Y, its profile is compared to that of I-AniI-S111Y. Though the specificity pattern is similar overall, the observed novel +3C specificity was later confirmed in a variant containing the I-NfiIP-derived K200N transfer (Figure 2b).

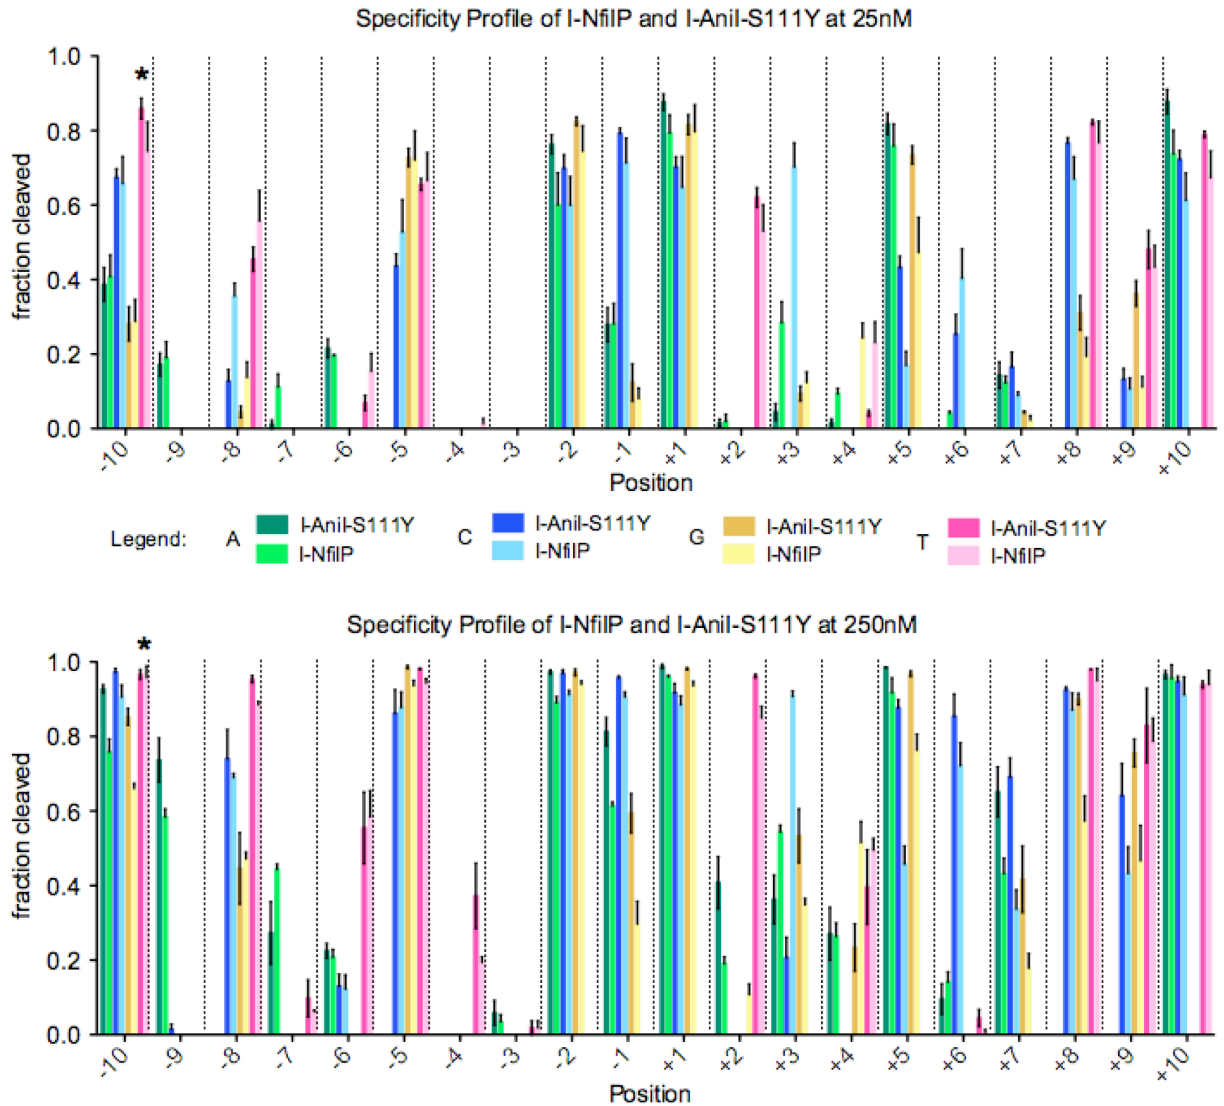

**Supplementary Figure S4. Cleavage profiles for the C-terminal loop transfers and I-Anil-F13Y at positions +7 through +10.**

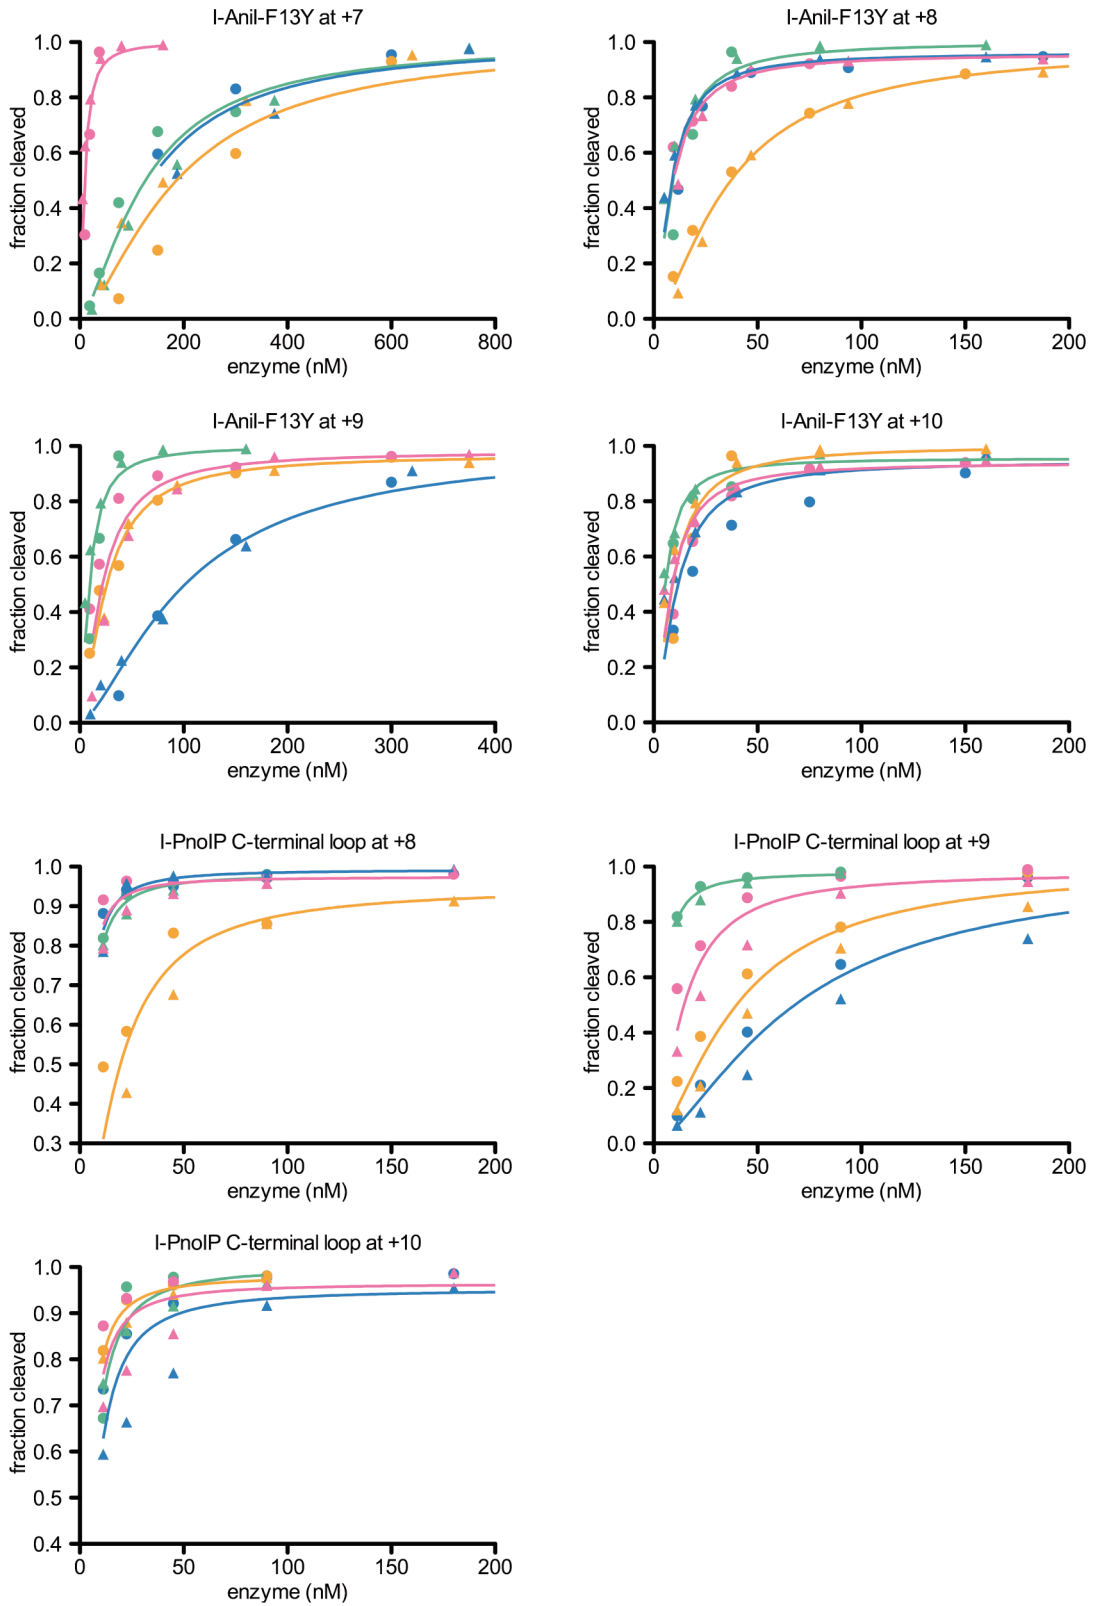

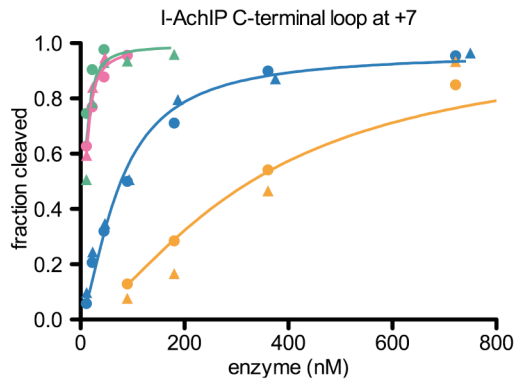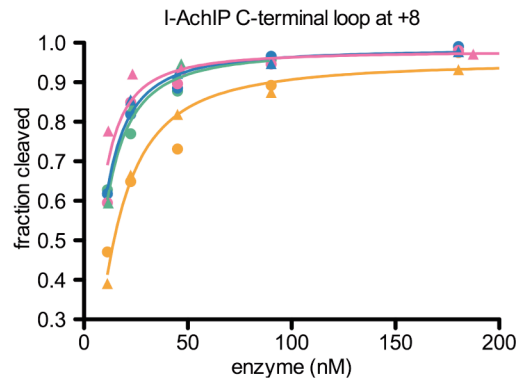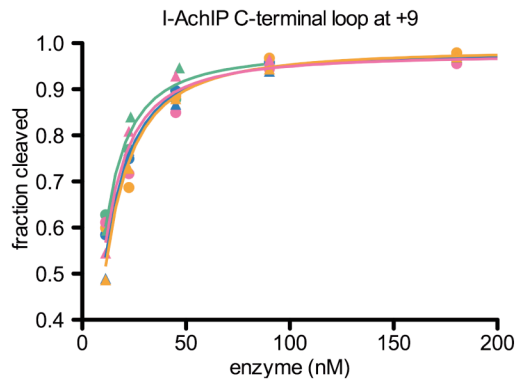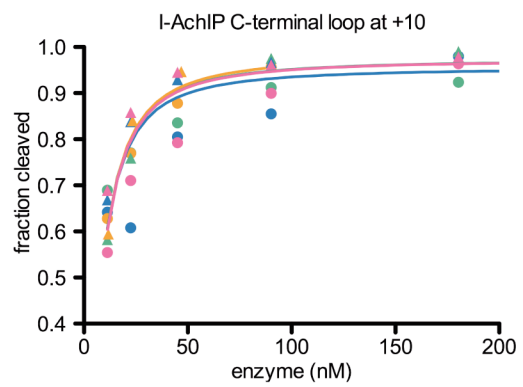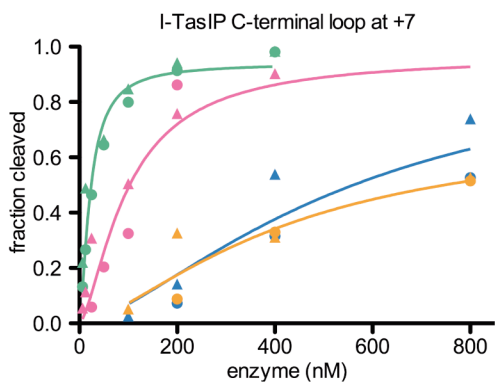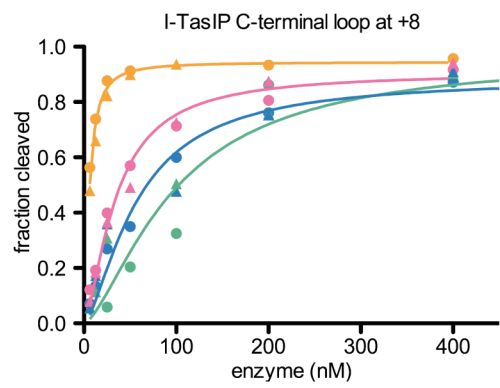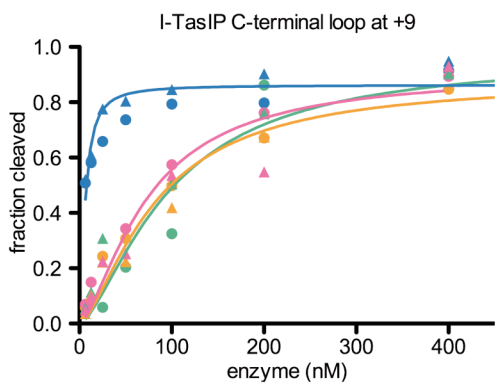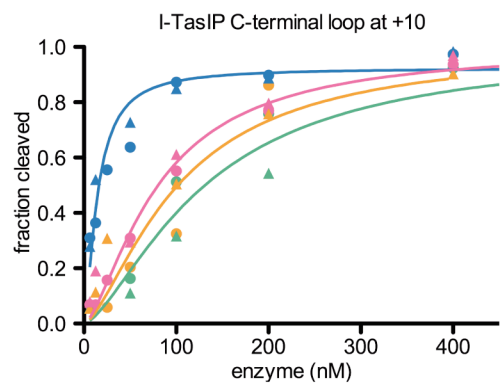

Legend ■ A ■ C ■ G ■ T

**Supplementary Figure S5. Cleavage profiles for the K200 variants and I-Anil-F13Y at +3, +4, and +5.**

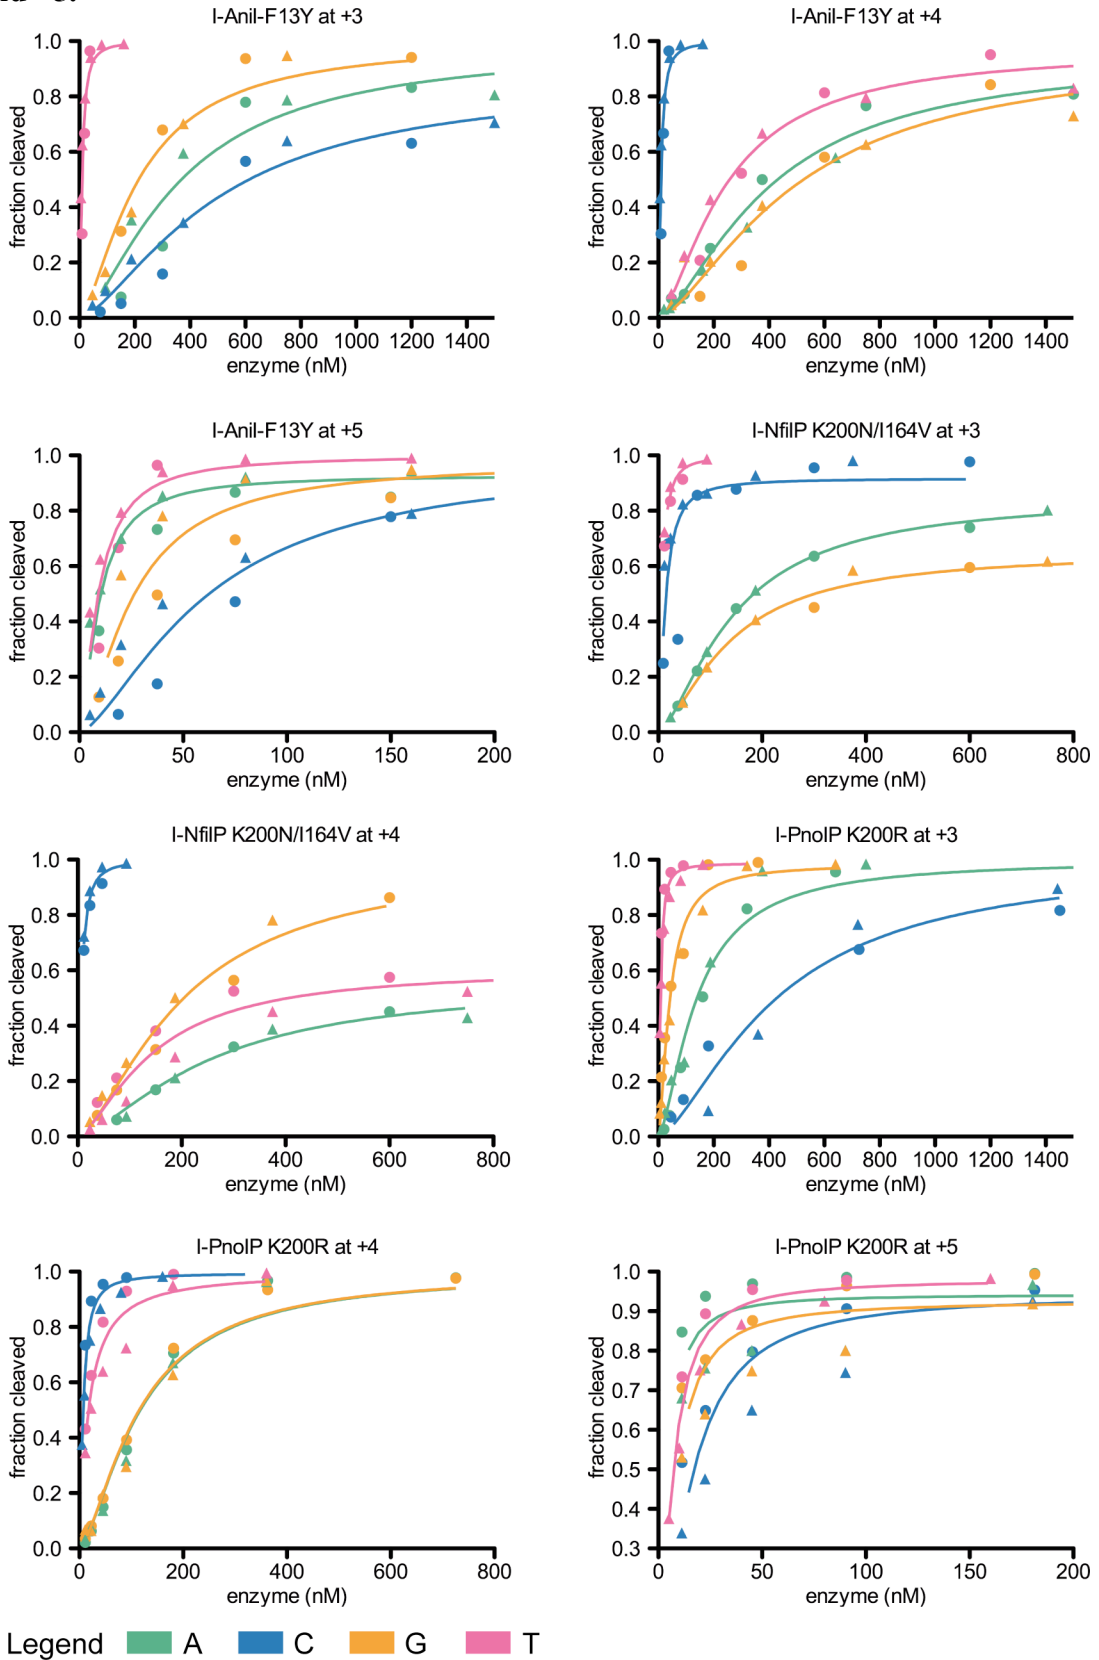

**Supplementary Figure S6. Cleavage profiles of variants affecting the central four target site positions.** Results for I-Anil-F13Y at position +2 and I-Anil-S111Y at -2 are provided here for comparison; the plot for I-Anil-F13Y at +3 can be seen in Supplementary Figure S5.

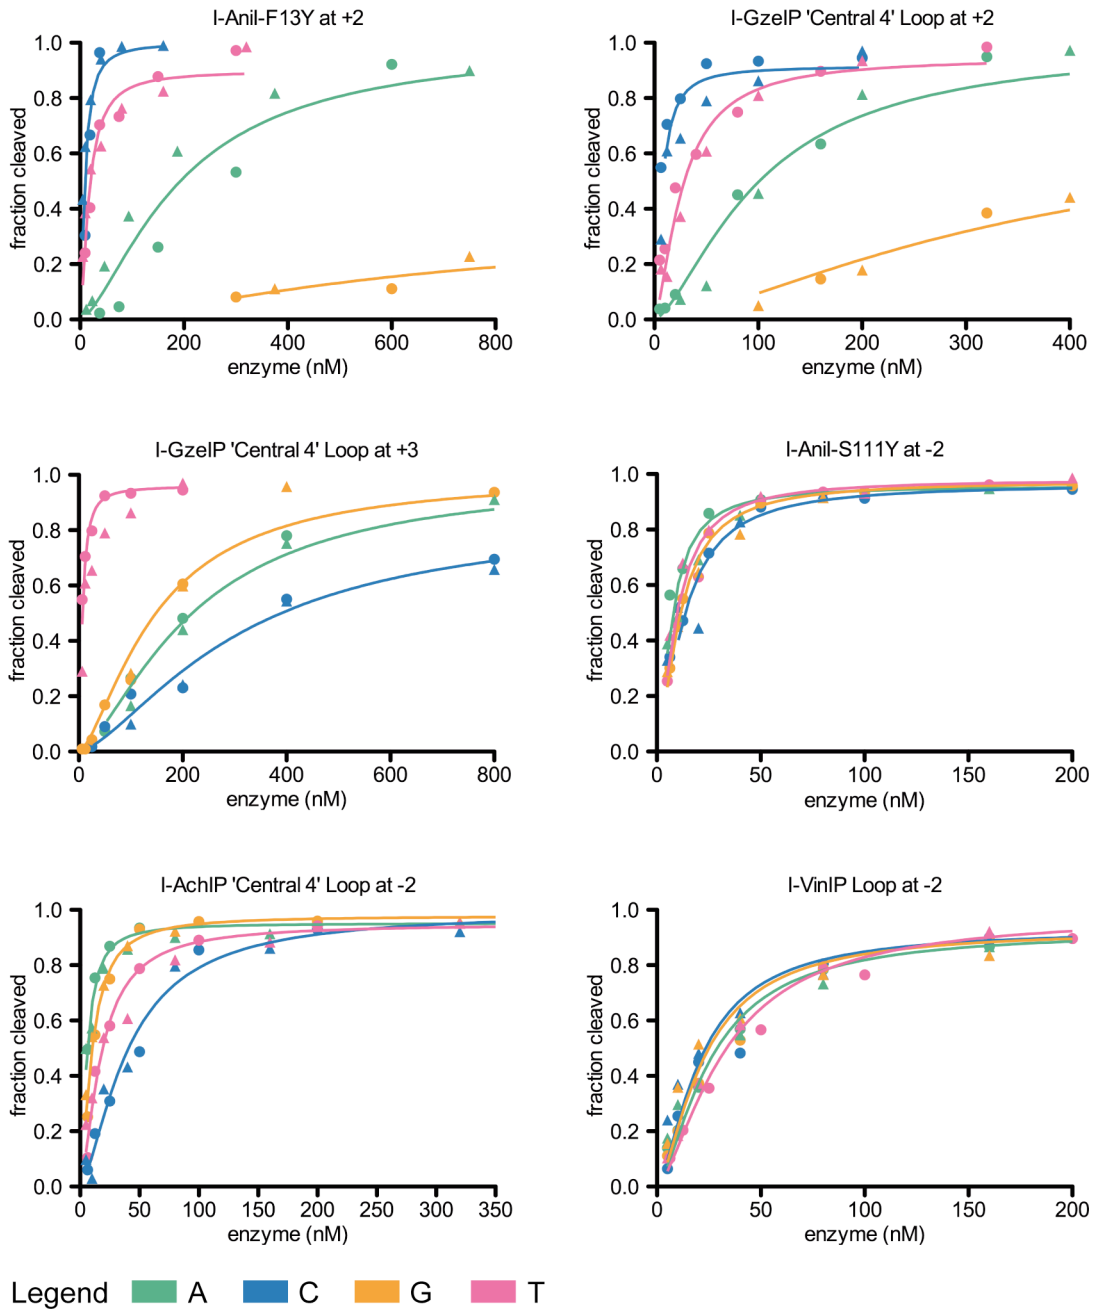

**Supplementary Figure S7. Cleavage profiles for I-Anil-S111Y at positions -6 and -5.** The corresponding  $EC_{0.5max}$  (nM) were shown previously (Figure 3b) along with the cleavage plots for the I-VinIP derived variants (Figure 3a) evidencing the important role of core mutations.

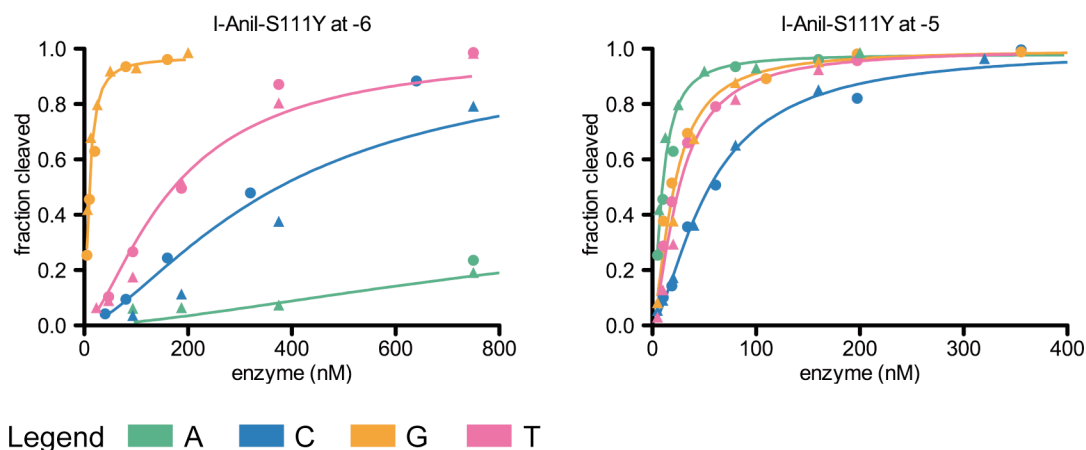

**Supplementary Figure S8. Cleavage profile for I-PnoIP N-terminal transfer at the -5 position.** The -5T substitution is preferred over the wild-type -5A. This result is in accordance with the -5T of the predicted I-PnoIP target site given in Figure 1c.

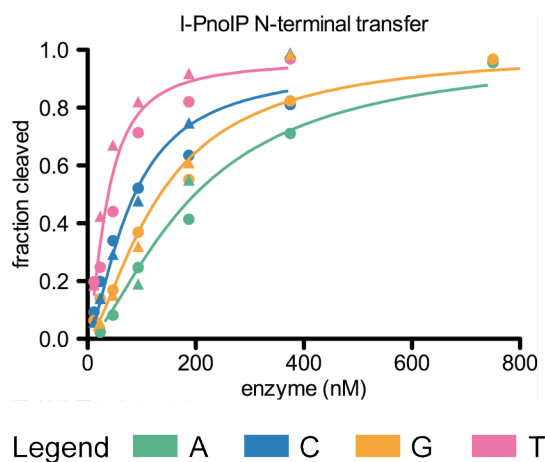

**Supplementary Table S3. Sequences of target sites near disease-causing genes that contain the novel +3C, +7A, and -6T specificities.**

Feasibly targetable cleavage sites in DNA sequences of disease-causing genes were identified computationally according to previously validated methods (4). For the site sequences given below, bases in lower case lettering differ from the native I-Anil target site. Colored bases indicate the substitutions that could not be cleaved prior to this study: -6T (yellow), +3C (blue), and +7A (green).

Human CCR5, a coreceptor for HIV-1, has been successfully targeted and modified by zinc-finger nucleases (5) and is now undergoing clinical trials (6), but there is potential for further modification with homing endonucleases. Nine target site positions differ from that of I-AniI, and we found homologue-derived mutations that can be grafted onto the I-AniI scaffold to target the thymine substitution at position -6 and the adenine at +7. Two target sites found in the murine fumaryl acetoacetate hydrolase gene (FAH, mutations can lead to tyrosinemia (7)) are also shown to have sets of substitutions relative to I-AniI that contain +3C, +7A, and -6T. Lastly, recent work has addressed gene delivery in large animal models that shows great potential in preclinical studies, especially canine models. Pyruvate kinase (PK) deficiency in dogs is associated with severe hemolytic anemia that can be treated via allogeneic transplantation, and *in vivo* gene delivery through transduced cells can sufficiently correct the XSCID disease phenotype (8). Both genes contain targetable sites that can benefit from our novel specificities.

| Gene                | Target Site          |
|---------------------|----------------------|
| CCR5                | ccAGtAtGTTgCcCacaAAA |
| FAH (Target Site 1) | TGAGccctTtcCcCccTAgc |
| FAH (Target Site 2) | TGAGtAGcTTTCTCataAgt |
| PK                  | cGtGGccaTTgCcCTGgAcA |
| XSCID               | gctGctGcTTctTCTGaccA |

1. Altschul, S.F., Gish, W., Miller, W., Myers, E.W., and Lipman, D.J. (1990) *J. Mol. Biol.* **215**, 403-410
2. Roberts, R.J., Belfort, M., Bestor, T., Bhagwat, A.S., Bickle, T.A., Bitinaite, J., Blumenthal, R.M., Degtyarev, S.Kh., Dryden, D.T., Dybvig, K., et al. (2003) *Nucleic Acids Res.* **31**, 1805-1812
3. Longo, A., Leonard, C.W., Bassi, G.S., Berndt, D., Krahn J., Hall, T.M., and Weeks, K.M. (2005) *Nat. Struct. Mol. Biol.* **12**, 779-787
4. Ashworth, J., Taylor, G. K., Havranek, J.J., Quadri, S.A., Stoddard, B.L., and Baker, D. (2010) *Nucleic Acids Res.* **38**, 5601-5608
5. Guo, H., Karberg, M., Long, M., Jones, J.P. 3<sup>rd</sup>, Sullenger, B., and Lambowitz, A.M. (2000) *Science* **289**, 452-457
6. University of Pennsylvania; Sangamo Biosciences. Autologous T-Cells Genetically Modified at the CCR5 Gene by Zinc Finger Nucleases SB-728 for HIV (Zinc-Finger). In: ClinicalTrials.gov [Internet]. Bethesda (MD): National Library of Medicine (US). 2000- [cited 2011 Apr 19]. Available from: <http://clinicaltrials.gov/show/NCT00842634> NLM Identifier: NCT00842634
7. Aponte, J.L., Sega, G.A., Hauser, L.J., Dhar, M.S., Withrow, C.M., Carpenter, D.A., Rinchik, E.M., Culiati, C.T., and Johnson, D.K. (2001) *Proc. Natl. Acad. Sci. U.S.A.* **98**, 641-645
8. Trobridge, G.D., and Kiem, H-P. (2010) *Gene Ther.* **17**, 939-948
